# Supplementary material for: Physical Activity Across Adulthood and Physical Performance in Midlife: Findings from a British Birth Cohort
Source: PubMed Central journal article supplement (PMC3185208; doi:10.1016/j.amepre.2011.06.035), 2011-10
Supplement: mmc1.pdf [file mmc1.pdf]

# Physical Activity Across Adulthood and Physical Performance in Midlife

## Findings from a British Birth Cohort Study

Rachel Cooper, PhD, Gita D. Mishra, PhD, Diana Kuh, PhD

---

## Appendix A

### Models compared when using the structured life course modelling approach<sup>1</sup>

Fully saturated model:

$$E(Y) = \alpha + \beta_1 Pa_1 + \beta_2 Pa_2 + \beta_3 Pa_3 + \theta_{12} Pa_1 Pa_2 + \theta_{23} Pa_2 Pa_3 + \theta_{13} Pa_1 Pa_3 + \theta_{123} Pa_1 Pa_2 Pa_3$$

Compared with:

(1) Critical\* period model

$$E(Y) = \alpha + \beta_1 Pa_1$$

$$\text{constraints: } \beta_2 = \beta_3 = 0; \theta_{12} = \theta_{23} = \theta_{13} = \theta_{123} = 0$$

(2) Accumulation model: summed score (assuming similar effect sizes at each age)

$$E(Y) = \alpha + \beta \sum_j Pa_j$$

$$\text{constraints: } \beta_1 = \beta_2 = \beta_3; \theta_{12} = \theta_{23} = \theta_{13} = \theta_{123} = 0$$

(3) Accumulation model: mutually adjusted (allowing for differences in effect size at each age)

$$E(Y) = \alpha + \beta_1 Pa_1 + \beta_2 Pa_2 + \beta_3 Pa_3$$

$$\text{constraints: } \beta_1 \neq \beta_2 \neq \beta_3; \theta_{12} = \theta_{23} = \theta_{13} = \theta_{123} = 0$$

Notes:

Pa=Physical activity; 1=at age 36 years; 2=at age 43 years; 3=at age 53 years

\*Critical periods may be more evident for chronic disease risk associated with developmental mechanisms in biological subsystems, whereas sensitive periods are likely to be more common in behavioral development<sup>2</sup>

## References for Appendix A

1. Mishra G, Nitsch D, Black S, De Stavola B, Kuh D, Hardy R. A structured approach to modelling the effects of binary exposure variables over the life course. *Int J Epidemiol* 2009;38:528–37.
2. Mishra GD, Ben-Shlomo Y, Kuh D. A life course approach to health behaviors: theory and methods. In: Steptoe A, ed. *Handbook of Behavioral Medicine: Methods and Applications*. New York: Springer, 2010.

## Appendix B

### Associations between lifetime physical activity score and physical performance at age 53 years

| Lifetime physical activity score | Chair rise performance (n=2290) |                                    | Standing balance (n=2311) |                                |
|----------------------------------|---------------------------------|------------------------------------|---------------------------|--------------------------------|
|                                  | n (%)                           | Difference in M (1/s*100) (95% CI) | n (%)                     | Difference in M ln(s) (95% CI) |
| 0                                | 396 (17.3)                      | 0.00                               | 416 (18.0)                | 0.00                           |
| 1-2                              | 749 (32.7)                      | 0.24 (0.04, 0.44)                  | 744 (32.2)                | 0.07 (-0.02, 0.16)             |
| 3-4                              | 676 (29.5)                      | 0.52 (0.31, 0.72)                  | 687 (29.7)                | 0.20 (0.10, 0.29)              |
| 5-6                              | 469 (20.5)                      | 0.93 (0.70, 1.15)                  | 464 (20.1)                | 0.31 (0.21, 0.42)              |
| p-value <sup>a</sup>             |                                 | <0.001                             |                           | <0.001                         |

Note: Effect estimates presented are adjusted for: gender, current height and weight, adult SEP (own occupation and education), smoking and health problems at age 53 years. Lifetime physical activity score derived by assigning those classified as inactive a value of 0, those as moderately active a value of 1, and those as most active a value of 2 at each age and then summing the values for the three ages whereby an individual with a physical activity score of 0 has been categorized as inactive at all three ages, whereas an individual with a physical activity score of 6 has been categorized as most active at all three ages.

<sup>a</sup> p-value from likelihood ratio test comparing a model with the physical activity score included to a model with the score not included

## Appendix C

Characteristics of the sample included in analyses ( $n=2442$ ) compared with the sample excluded due to missing data on covariates

|                                                          | % or M (SD)               |                          | <i>p</i> -value <sup>b</sup> |
|----------------------------------------------------------|---------------------------|--------------------------|------------------------------|
|                                                          | Excluded<br>( $n=514^a$ ) | Included<br>( $n=2442$ ) |                              |
| <b>Strength and physical performance at age 53 years</b> |                           |                          |                              |
| Grip strength (kg)                                       | 37.6 (14.5)               | 37.6 (14.3)              | 0.92                         |
| Chair rise time ((1/s)x100) <sup>c</sup>                 | 5.2 (1.8)                 | 5.2 (1.7)                | 0.99                         |
| Standing balance time (s) <sup>d</sup>                   | 1.6 (0.8)                 | 1.6 (0.8)                | 0.44                         |
| <b>PHYSICAL ACTIVITY AT GIVEN AGE</b>                    |                           |                          |                              |
| <b>36 years</b>                                          |                           |                          |                              |
| Inactive                                                 | 41.9                      | 35.8                     | 0.18                         |
| Moderately active                                        | 23.6                      | 25.7                     |                              |
| Most active                                              | 34.5                      | 38.5                     |                              |
| <b>43 years</b>                                          |                           |                          |                              |
| Inactive                                                 | 52.5                      | 51.2                     | 0.86                         |
| Moderately active                                        | 22.1                      | 23.4                     |                              |
| Most active                                              | 25.4                      | 25.4                     |                              |
| <b>53 years</b>                                          |                           |                          |                              |
| Inactive                                                 | 53.0                      | 48.2                     | 0.01                         |
| Moderately active                                        | 13.1                      | 18.4                     |                              |
| Most active                                              | 33.9                      | 33.4                     |                              |
| <b>OTHER CHARACTERISTICS AT 53 YEARS</b>                 |                           |                          |                              |
| <b>Gender (Male)</b>                                     | 51.2                      | 48.7                     | 0.31                         |
| <b>Weight (kg)</b>                                       | 77.6 (16.3)               | 77.5 (14.9)              | 0.89                         |
| <b>Height (cm)</b>                                       | 168.3 (9.5)               | 168.0 (8.9)              | 0.52                         |
| <b>Occupational class</b>                                |                           |                          |                              |
| I or II                                                  | 41.3                      | 43.9                     | 0.11                         |
| III                                                      | 39.4                      | 40.6                     |                              |
| IV or V                                                  | 19.3                      | 15.5                     |                              |
| <b>Educational level</b>                                 |                           |                          |                              |
| Degree or higher                                         | 8.5                       | 10.1                     | 0.002                        |
| A levels or equivalent                                   | 23.0                      | 26.2                     |                              |
| O levels or equivalent                                   | 16.8                      | 20.9                     |                              |
| CSE, clerical course or equivalent                       | 5.7                       | 7.7                      |                              |
| None                                                     | 46.0                      | 35.1                     |                              |
| <b>Disabling/life-threatening health conditions</b>      |                           |                          |                              |
| None                                                     | 87.2                      | 88.5                     | 0.38                         |
| One or more                                              | 12.8                      | 11.5                     |                              |
| <b>Smoking status</b>                                    |                           |                          |                              |
| Never                                                    | 38.1                      | 42.9                     | 0.007                        |
| Ex                                                       | 33.5                      | 35.1                     |                              |
| Current                                                  | 28.4                      | 22.1                     |                              |

<sup>a</sup> Total  $n$  varies due to missing data

<sup>b</sup>  $p$ -values from t-test or chi-squared test, as appropriate

<sup>c</sup> Reciprocal of time taken for 10 chair rises x 100 (for example, a value of 5=20s to complete 10 chair rises)

<sup>d</sup> Geometric M and SD
